# Supplementary figures and images for: The endoplasmic reticulum stress marker CHOP predicts survival in malignant mesothelioma
Source: PubMed Central journal article supplement — Br J Cancer. 2013 Feb 14;108(6):1340–7. doi: 10.1038/bjc.2013.66 (PMC3619254; doi:10.1038/bjc.2013.66), 2013-02-14

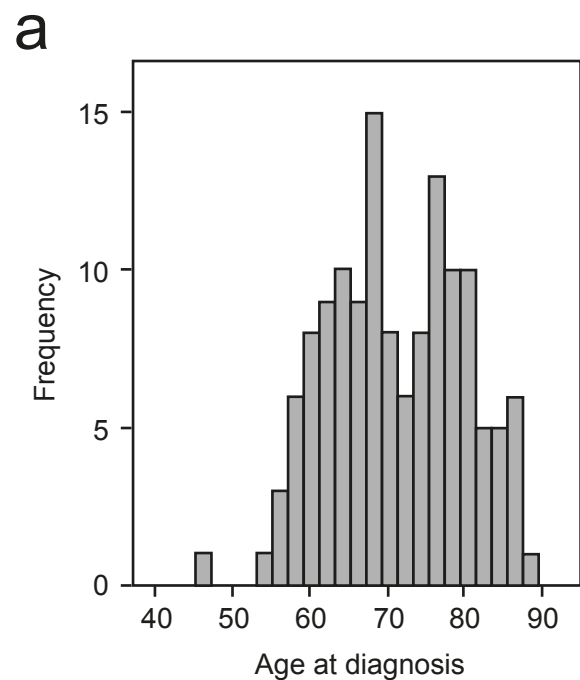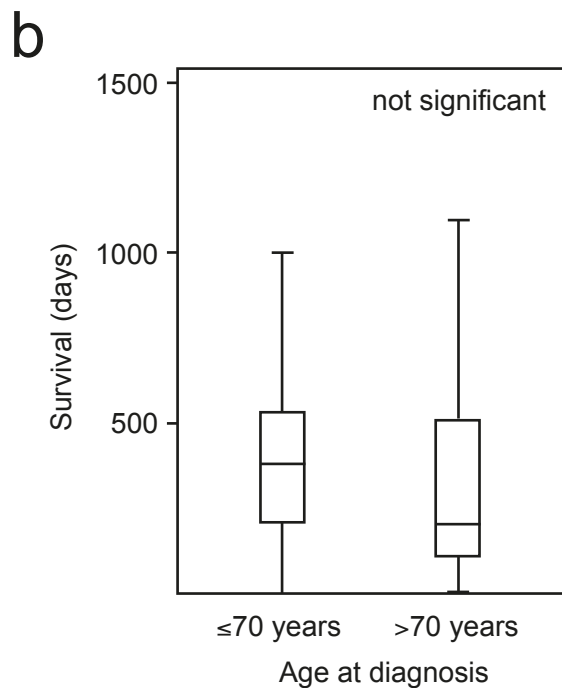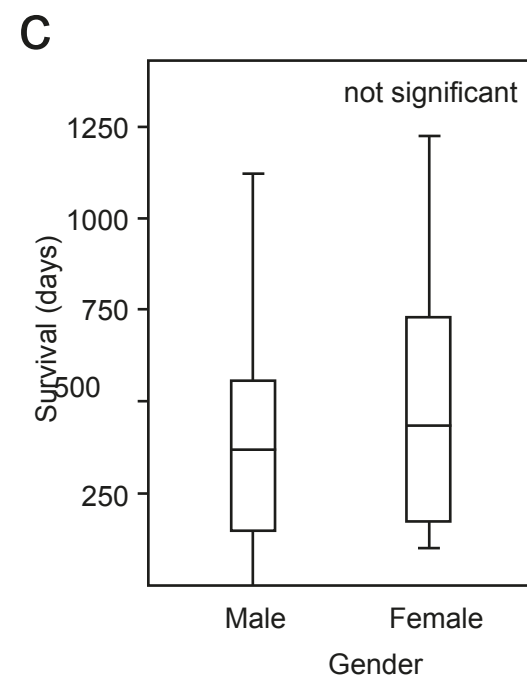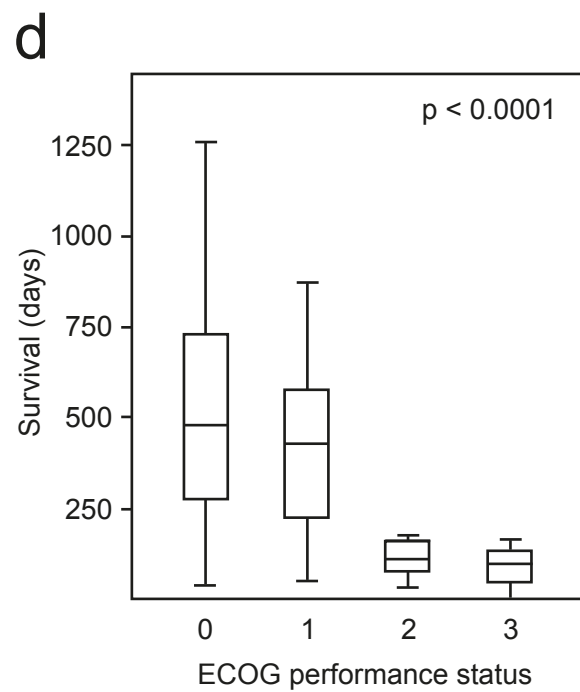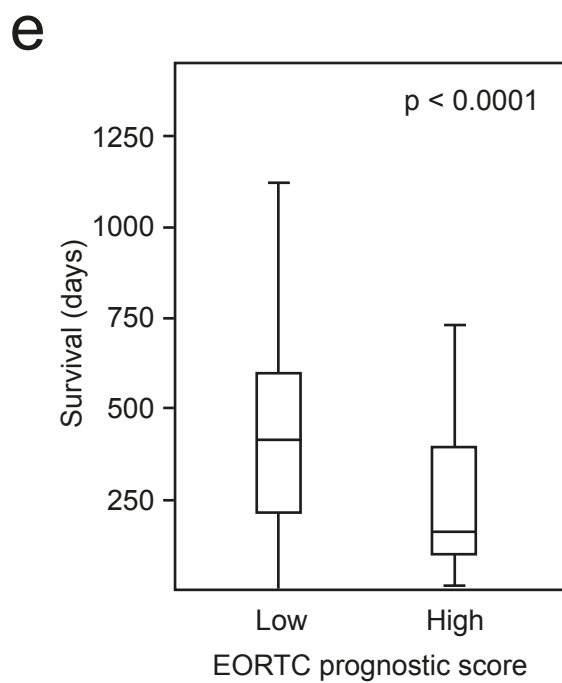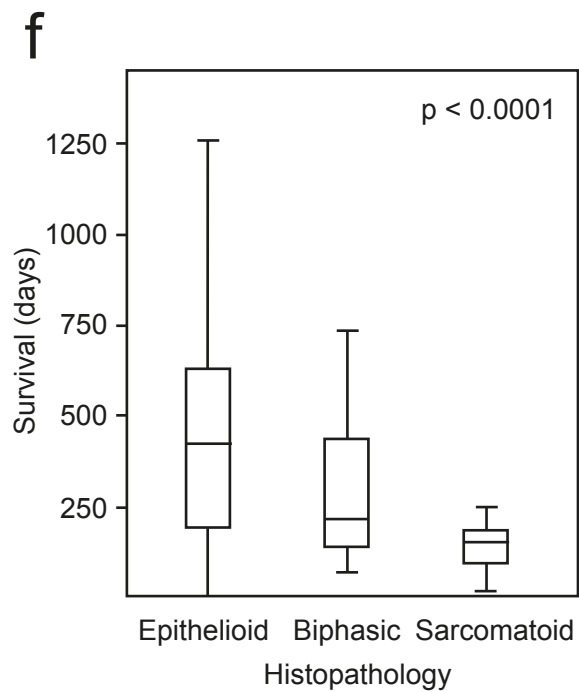

Supplement: bjc201366x1.pdf [file bjc201366x1.pdf]
